# Supplementary material
Source: publisher figshare collection journal article supplement (https://gsapubs.figshare.com/ndownloader/files/22745588)

TABLE DR-1. FISSION TRACK SAMPLE LOCALITY, COUNTING, AND AGE DATA

| Sample                            | Irradiation | Latitude    | Longitude    | Paleo-   | Elev. | No  | Spontaneous |     | Induced |      | P( $\chi^2$ ) | Dosimeter |      | Age $\pm 1\sigma$ |
|-----------------------------------|-------------|-------------|--------------|----------|-------|-----|-------------|-----|---------|------|---------------|-----------|------|-------------------|
| number                            | number      | (°N)        | (°W)         | depth(m) | (m)   | xls | Rho-S       | NS  | Rho-I   | NI   | (%)           | Rho-D     | ND   | (Ma)              |
| <b>Santa Rosa Stock</b>           |             |             |              |          |       |     |             |     |         |      |               |           |      |                   |
| JC00-SR4                          | SU058-15    | 41° 34' 50" | 117° 37' 30" | 952      | 7260  | 35  | 0.3157      | 901 | 1.1107  | 3170 | 41.6          | 1.4790    | 4065 | 75.2 $\pm$ 3.4    |
| JC00-SR9                          | SU055-11    | 41° 34' 08" | 117° 39' 13" | 1592     | 7060  | 30  | 0.4029      | 766 | 1.4168  | 2694 | 0.0           | 1.3733    | 3877 | 70.1 $\pm$ 4.6    |
| JC00-SR13                         | SU058-16    | 41° 34' 49" | 117° 40' 48" | 1837     | 8360  | 29  | 0.2556      | 668 | 1.2556  | 3281 | 7.9           | 1.4790    | 4065 | 52.8 $\pm$ 3.0    |
| JC00-SR15                         | SU055-13    | 41° 34' 50" | 117° 41' 44" | 2370     | 8160  | 36  | 0.3568      | 727 | 1.6986  | 3461 | 44.6          | 1.4065    | 3877 | 52.9 $\pm$ 2.5    |
| <b>Sawtooth Stock</b>             |             |             |              |          |       |     |             |     |         |      |               |           |      |                   |
| JC00-SR17                         | SU055-14    | 41° 34' 49" | 117° 43' 53" | 3360     | 7240  | 24  | 0.1340      | 211 | 3.5249  | 5551 | 9.1           | 1.4065    | 3877 | 9.6 $\pm$ 0.8     |
| JC00-SR19                         | SU055-15    | 41° 35' 01" | 117° 44' 55" | 4275     | 5120  | 28  | 0.0660      | 95  | 2.2889  | 3293 | 66.7          | 1.4286    | 3877 | 7.4 $\pm$ 0.8     |
| JC00-SR22                         | SU055-16    | 41° 34' 55" | 117° 45' 08" | 4427     | 5340  | 31  | 0.1584      | 210 | 4.9602  | 6577 | 82.6          | 1.4286    | 3877 | 8.2 $\pm$ 0.6     |
| JC00-SR29                         | SU055-17    | 41° 34' 01" | 117° 45' 34" | 4732     | 4880  | 29  | 0.0602      | 102 | 2.4349  | 4128 | 30.1          | 1.4508    | 3877 | 6.4 $\pm$ 0.8     |
| JC01-SR50                         | SU058-17    | 41° 34' 44" | 117° 44' 01" | 3421     | 7200  | 32  | 0.1098      | 243 | 2.7024  | 5979 | 0.2           | 1.4930    | 4065 | 11.2 $\pm$ 0.9    |
| JC01-SR51                         | SU058-18    | 41° 34' 44" | 117° 44' 17" | 3543     | 7160  | 35  | 0.1111      | 202 | 2.8655  | 5209 | 9.6           | 1.4930    | 4065 | 10.2 $\pm$ 0.9    |
| JC01-SR52                         | SU058-19    | 41° 34' 56" | 117° 44' 30" | 3833     | 6500  | 27  | 0.0897      | 93  | 1.8827  | 1951 | 90.0          | 1.5080    | 4065 | 12.0 $\pm$ 1.5    |
| <b>Andorno Stock</b>              |             |             |              |          |       |     |             |     |         |      |               |           |      |                   |
| JC00-SR49                         | SU055-18    | 41° 26' 08" | 117° 45' 31" | 3100     | 5250  | 30  | 0.1007      | 167 | 1.6299  | 2703 | 10.9          | 1.4508    | 3877 | 15.4 $\pm$ 1.6    |
| <b>Northern Pine Forest Range</b> |             |             |              |          |       |     |             |     |         |      |               |           |      |                   |
| JC00-PF1                          | SU055-19    | 41° 46' 11" | 118° 35' 27" |          | 4840  | 35  | 0.0326      | 63  | 1.0069  | 1944 | 44.7          | 1.4116    | 3877 | 8.2 $\pm$ 1.0     |
| JC01-PF2                          | SU058-01    | 41° 45' 36" | 118° 35' 41" |          | 4760  | 36  | 0.0597      | 130 | 1.3635  | 2969 | 36.2          | 1.3818    | 4065 | 10.9 $\pm$ 1.0    |

*Note:* Abbreviations are: No xls, number of individual crystals (grains) dated; Rho-S, spontaneous track density ( $\times 10^6$  tracks per square centimeter); NS, number of spontaneous tracks counted; Rho-I, induced track density in external detector (muscovite) ( $\times 10^6$  tracks per square centimeter); NI, number of induced tracks counted; P( $\chi^2$ ),  $\chi^2$  probability (Galbraith, 1981; Green, 1981); Rho-D, induced track density in external detector adjacent to dosimetry glass ( $\times 10^6$  tracks per square centimeter); ND, number of tracks counted in determining Rho-D. Age is the sample central fission track age (Galbraith and Laslett, 1993), calculated using zeta calibration method (Hurford and Green, 1983). Analyst: J. P. Colgan.

The following is a summary of key laboratory procedures. Apatites were etched for 20 s in 5N nitric acid at room temperature. Grains were dated by external detector method with muscovite detectors. Samples were irradiated in well thermalized positions of Oregon State University reactor. CN5 dosimetry glasses with muscovite external detectors were used as neutron flux monitors. External detectors were etched in 48% HF. Tracks counted with Zeiss Axioskop microscope with 100x air objective, 1.25x tube factor, 10x eyepieces, transmitted light with supplementary reflected light as needed; external detector prints were located with Kinetek automated scanning stage (Dumitru, 1993). Only grains with c axes subparallel to slide plane were dated. Ages calculated using zeta calibration factor of 359.8. Confined tracks lengths were measured only in apatite grains with c axes subparallel to slide plane; only horizontal tracks measured (within  $\pm 5-10^\circ$ ), following protocols of Laslett and others (1982). Lengths were measured with computer digitizing tablet and drawing tube, calibrated against stage micrometer (Dumitru, 1993). Confined track lengths were measured along with angles of tracks to the grains' c-axes and the Dpar track entrance diameter, following protocols of Ketcham and others (1999, 2000); confined tracks hosted by surface tracks and by cleavage surfaces were both measured. Age calculations were done with program by J. P. Colgan.

#### DATA TABLE REFERENCES

- Dumitru, T.A., 1993, A new computer-automated microscope stage system for fission-track analysis: Nuclear Tracks and Radiation Measurements, v. 21, p. 575-580.
- Galbraith, R.F., 1981, On statistical models for mixed fission-track ages: Nuclear Tracks and Radiation Measurements, v. 5, p. 471-478.
- Galbraith, R.F., and Laslett, G.M., 1993, Statistical models for mixed fission-track ages: Nuclear Tracks and Radiation Measurements, v. 21, p. 459-470.
- Green, P.F., 1981, A new look at statistics in fission-track dating: Nuclear Tracks and Radiation Measurements, v. 5, p. 77-86.
- Hurford, A.J., and Green, P.F., 1983, The zeta age calibration in fission-track dating: Chemical Geology, v. 41, p. 285-317.
- Ketcham, R.A., Donelick, R.A., and Carlson, W.D., 1999, Variability of apatite fission-track annealing kinetics. 3. Extrapolation to geological time scales: American Mineralogist, v. 84, p. 1235-1255.
- Ketcham, R.A., Donelick, R.A., and Donelick, M.B., 2000, AFTSolve: A program for multi-kinetic modeling of apatite fission-track data: Geological Materials Research, v. 2, p. 1-32 (an entirely electronic journal at <http://gmr.minsocam.org/papers/v2/2n1/v2n1abs.html>)
- Laslett, G.M., Kendall, W.S., Gleadow, A.J.W., and Duddy, I.R., 1982, Bias in the measurements of fission-track length distributions: Nuclear Tracks and Radiation Measurements, v. 6, p. 79-85.

**Colgan and others, Northwestern Nevada, Table DR-1 for data repository**

FIGURE DR-1. FISSION-TRACK LENGTH DATA

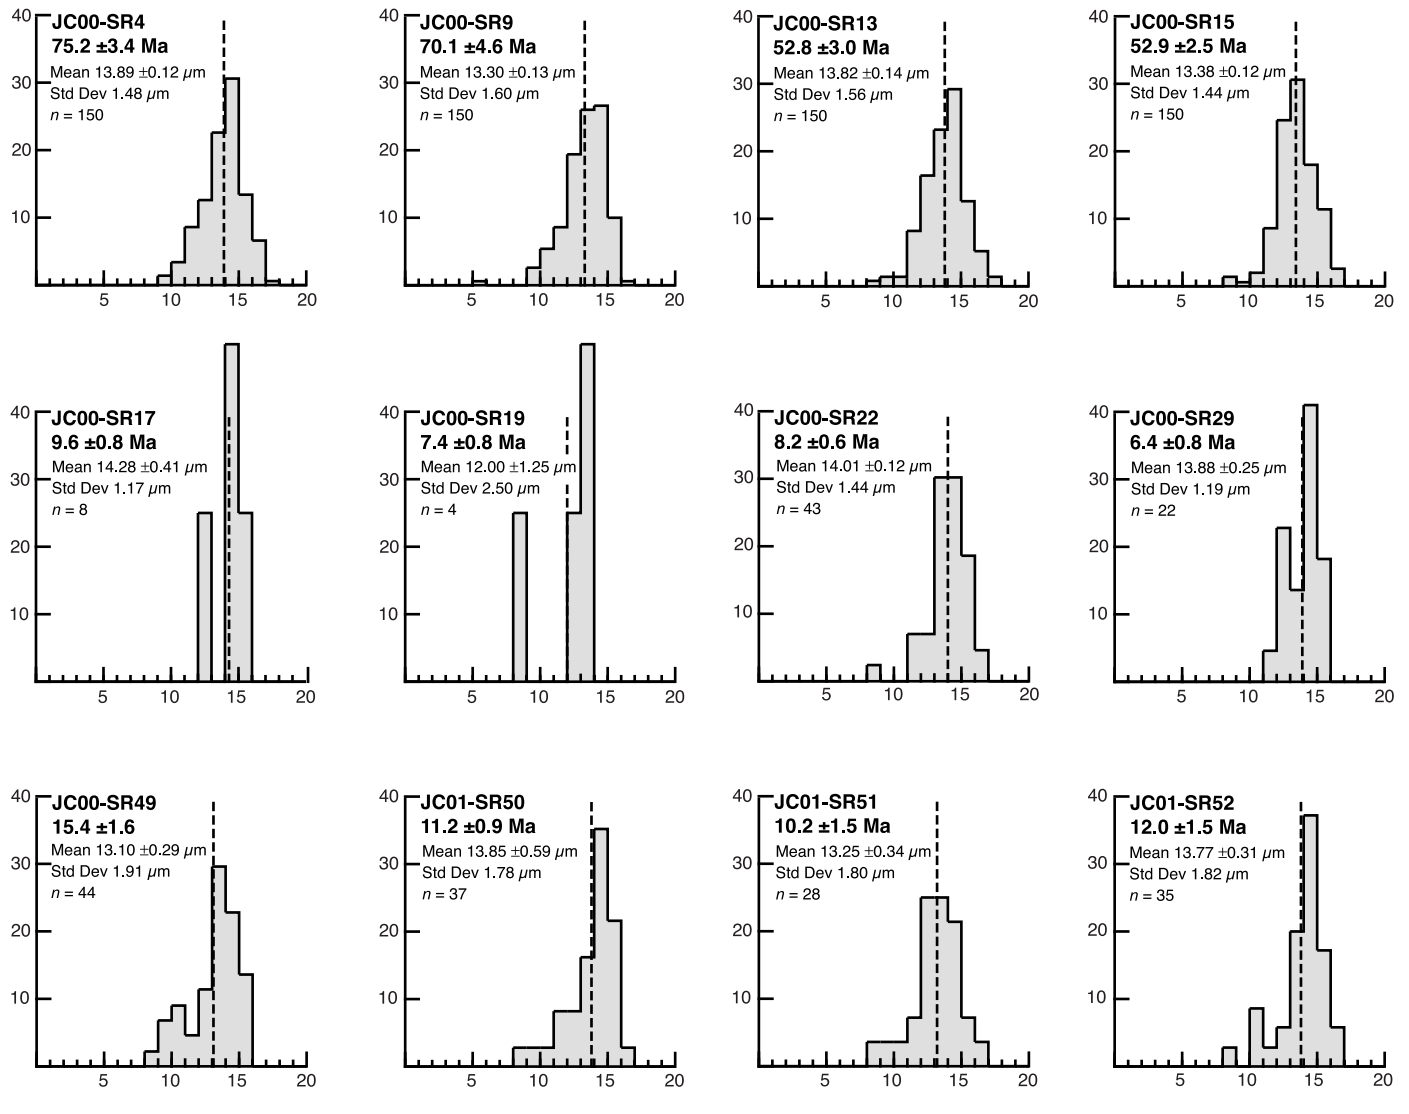

KEY TO LENGTH DATA

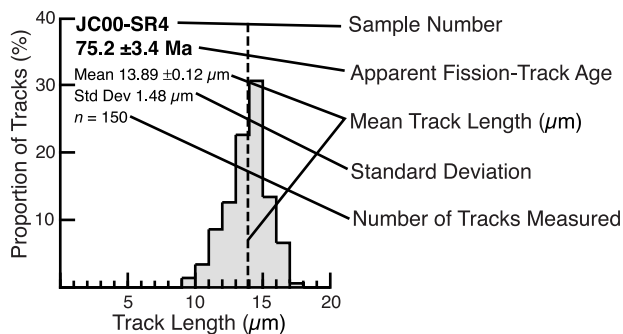

Supplement: Supplementary file 1 [file 22745588]
